# Supplementary material for: Cohort Profile: East London Genes & Health (ELGH), a community based population genomics and health study of British-Bangladeshi and British-Pakistani people
Source: bioRxiv or medRxiv preprint supplement (doi:10.1101/426163), 2019-02-07
Supplement: Supplementary file [file 426163-2.pdf]

**Supplementary file 2. Example of a primary care electronic health record data extraction template: for type 2 diabetes.** This template includes relevant background demographic variables, diagnoses, clinical measurements and laboratory investigations

| Variable name              | Field type | READ code (if relevant)                               | Excluded READ codes                   | Time window of extraction |
|----------------------------|------------|-------------------------------------------------------|---------------------------------------|---------------------------|
| Date of data extract       | Date       |                                                       |                                       |                           |
| Patient ID                 | Numeric    | NA                                                    |                                       |                           |
| Gender                     | Text       | NA                                                    |                                       |                           |
| Age                        | Numeric    | NA                                                    |                                       |                           |
| Year of birth              | Year       | NA                                                    |                                       |                           |
| Ethnicity                  | code       | 9S%, 9i%                                              |                                       | latest ever               |
| Country of birth           | code       | 13e% , 13Zq , 13k% , 13g% , 13d% , 13f% , 13j% , 13h% |                                       | latest ever               |
| IMD2010                    | Numeric    | NA                                                    |                                       | latest ever               |
| LSOA2011                   | code       | NA                                                    |                                       | latest ever               |
| Registration Start Date    | Date       | NA                                                    |                                       |                           |
| Registration End Date      | Date       | NA                                                    |                                       |                           |
| Family History of Diabetes | code/date  | 1253                                                  |                                       | latest ever               |
| Type 1 Diabetes            | code/date  | C10E% , C10ER                                         | 21263, 212H Diabetes resolved         | earliest ever             |
| Type 2 Diabetes            | code/date  | C10F% , C109J                                         | C10F8 , 21263, 212H Diabetes resolved | earliest ever             |
| Secondary Diabetes         | code/date  | C10H% , C10B, C10N% , C10G%                           |                                       | earliest ever             |

|                                                              |                                     |                                                                                                                                                                                                                                         |                                                                                           |                                                                                                    |
|--------------------------------------------------------------|-------------------------------------|-----------------------------------------------------------------------------------------------------------------------------------------------------------------------------------------------------------------------------------------|-------------------------------------------------------------------------------------------|----------------------------------------------------------------------------------------------------|
| Other types of diabetes                                      | code/date                           | C10A, C10C, C10D, C1A%, C10M%, C326%, A3A2, C135, PKyP, Q441, C10FS, C150%, C3500, C10N1, C370%, PKyF, C1zy4, PH3yA, PKy93, PKy1                                                                                                        |                                                                                           | earliest ever                                                                                      |
| Pancreatic disease/surgery                                   | code/date                           | J670%, J671%, J6710, J6711, J67y6, 9b8G                                                                                                                                                                                                 |                                                                                           | earliest ever                                                                                      |
| Diabetes in pregnancy                                        | code/date                           | L1808, L1809                                                                                                                                                                                                                            |                                                                                           | earliest ever                                                                                      |
| Diabetes emergencies                                         | code/date                           | C10EM, C109K                                                                                                                                                                                                                            |                                                                                           | latest ever                                                                                        |
| Bariatric surgery                                            | code/date                           | 76110, 76111, 76112, 76113, 76114, 76115, 76116, 76130, 76131, 76132, 76133, 76134, 76135, 76136, 76140, 76141, 76160, 76166                                                                                                            |                                                                                           | earliest ever                                                                                      |
| Diabetes risk: Prediabetes code OR glucose intolerance codes | code/date (x2)                      | C11y2, C11y3, C11y5, R10E, R10D0, R102                                                                                                                                                                                                  |                                                                                           | earliest AND latest ever                                                                           |
| Current smoker                                               | code/date                           | 1371, 1372,1373,1374,1375,1376,1377,1378,1379,137a,137A,137b,137B,137c, 137C, 137d, 137e, 137f, 137F, 137g, 137G, 137h, 137H, 137j, 137J, 137K, 137l, 137L, 137m,137M,137n,137N,137O,137P, 137Q, 137R, 137S, 137T, 137V, 137X,137Y,137Z | 137D, 137E, 137i, 137I, 137k, 137o,137U,137W, EMISNQEX4, EMISNQSM14,EMISNQS N1,EMISNQWA11 | latest ever                                                                                        |
| On examination weight                                        | code/date/value/unit/age@event (x3) | 22A                                                                                                                                                                                                                                     |                                                                                           | earliest ever AND in +/- 6 month window around T1 or T2 diagnosis AND latest ever AND highest ever |
| On examination height                                        | code/date/value/unit/age@event (x3) | 229                                                                                                                                                                                                                                     |                                                                                           | earliest ever AND latest up to + 6 months                                                          |

|                   |                                |             |  |                                                                                                    |
|-------------------|--------------------------------|-------------|--|----------------------------------------------------------------------------------------------------|
|                   |                                |             |  | after T1 or T2 diagnosis                                                                           |
| BMI               | code/date/value/age@event (x3) | 22K         |  | earliest ever AND in +/- 6 month window around T1 or T2 diagnosis AND latest ever AND highest ever |
| HbA1c             | code/date/value (x3)           | 42W5 , 42W4 |  | earliest ever AND in +/- 6 month window around T1 or T2 diagnosis AND latest ever AND highest ever |
| Total cholesterol | code/date/value (x3)           | 44P         |  | earliest ever AND in +/- 6 month window around T1 or T2 diagnosis AND latest ever AND highest ever |
| HDL cholesterol   | code/date/value (x3)           | 44P5        |  | earliest ever AND in +/- 6 month window around T1 or T2 diagnosis AND latest ever AND highest ever |

|                                |                      |      |  |                                                                                                    |
|--------------------------------|----------------------|------|--|----------------------------------------------------------------------------------------------------|
| Serum LDL cholesterol (LDL-C)  | code/date/value (x3) | 44P6 |  | earliest ever AND in +/- 6 month window around T1 or T2 diagnosis AND latest ever AND highest ever |
| Serum triglycerides            | code/date/value (x3) | 44Q  |  | earliest ever AND in +/- 6 month window around T1 or T2 diagnosis AND latest ever AND highest ever |
| Urine protein/creatinine ratio | code/date/value (x2) | 44ID |  | earliest ever AND latest ever                                                                      |
| Urine albumin/creatinine ratio | code/date/value (x2) | 46TC |  | earliest ever AND latest ever                                                                      |
| Urine albumin                  | code/date/value (x2) | 46N4 |  | earliest ever AND latest ever                                                                      |
| Systolic Blood Pressure        | code/date/value (x2) | 2469 |  | earliest ever AND latest ever AND highest ever                                                     |
| Diastolic Blood Pressure       | code/date/value (x2) | 246A |  | earliest ever AND latest ever AND highest ever                                                     |
| Serum creatinine               | code/date/value (x2) | 44J3 |  | earliest ever AND latest ever                                                                      |

|      |                         |      |  |                                     |
|------|-------------------------|------|--|-------------------------------------|
| eGFR | code/date/value<br>(x2) | 451E |  | earliest<br>ever AND<br>latest ever |
|------|-------------------------|------|--|-------------------------------------|
